# Supplementary material
Source: MDPI journal article supplement (https://www.mdpi.com/2072-4292/13/22/4661)
Supplement: s1 [file s1]

Table S1. Variables used for estimating elephant occupancy probability.

| Variable                                | Description                                                                 | Data source                                                     | Expected effects on elephant detection/occupancy | Original resolution     | Supporting citation |
|-----------------------------------------|-----------------------------------------------------------------------------|-----------------------------------------------------------------|--------------------------------------------------|-------------------------|---------------------|
| Detection                               |                                                                             |                                                                 |                                                  |                         |                     |
| Elephant location                       | Field observation data                                                      | Divisional Forest Office of Keonjhar District                   |                                                  |                         |                     |
| Occupancy                               |                                                                             |                                                                 |                                                  |                         |                     |
| Environmental variables                 |                                                                             |                                                                 |                                                  |                         |                     |
| Forest                                  | Dense forest, Open forest and Bush                                          | Forest Survey of India                                          | Positive                                         | 23.5 m *<br>23.5 m      | [16,39,81,82]       |
| Enhanced Vegetation Index (EVI)         | Proxy for forage availability                                               | MODIS Terra product MOD13A3                                     | Positive                                         | 1km *<br>1km<br>Monthly | [19,62]             |
| Terrain Roughness Index (TRI)           | relative change in elevation that represents the unevenness of the region   | Space Shuttle Radar Topography Mission- Digital elevation model | Negative                                         | 30m *<br>30m            | [19]                |
| Precipitation                           | Annual averaged precipitation (min ~650 mm; avg ~2500 mm; maximum ~5900 mm) | Special Relief Organization, Government of Odisha               | Positive                                         | 1km *<br>1km<br>Monthly | [83-85]             |
| Temperature                             | Annual averaged of daytime land surface temperature                         | Terra MODIS- MOD11A1                                            | Negative                                         | Daily                   | [85,86]             |
| Anthropogenic variables                 |                                                                             |                                                                 |                                                  |                         |                     |
| Euclidian distance to Waterbodies (ECD) | Euclidian distance to water bodies from each pixels                         | Sentinel-2 Level-1C and Divisional Forest Office                | Negative                                         | 10m *<br>10m            | [30,87]             |
| ECD Mining                              | Euclidian distance to mining sites from each pixel                          | Sentinel-2 Level-1C and Divisional Forest Office                | Positive                                         | 10m *<br>10m            | [57,88]             |
| ECD Cropland                            | Euclidian distance to cropland from each pixel                              | Sentinel-2 Level-1C and Divisional Forest Office                | Positive                                         | 10m *<br>10m            | [89-91]             |
| ECD Rural                               | Euclidian distance to rural from each pixel                                 | Sentinel-2 Level-1C and Divisional Forest Office                | Both +/-                                         | 10m *<br>10m            | [28,91,92]          |
| ECD Urban                               | Euclidian distance to urban from each pixel                                 | Sentinel-2 Level-1C and Divisional Forest Office                | Positive                                         | 10m *<br>10m            | [28,91,92]          |

|                                |                                                                 |                             |          |              |         |
|--------------------------------|-----------------------------------------------------------------|-----------------------------|----------|--------------|---------|
| Road-<br>Railway<br>density    | Density of all major<br>roads and railway<br>line in each pixel | Divisional Forest<br>Office | Negative |              | [93-95] |
| Human<br>population<br>Density | Density of human<br>population in each<br>pixel                 | SEDAC (CIESIN-<br>SEDAC)    | Negative | 1km *<br>1km | [19,85] |

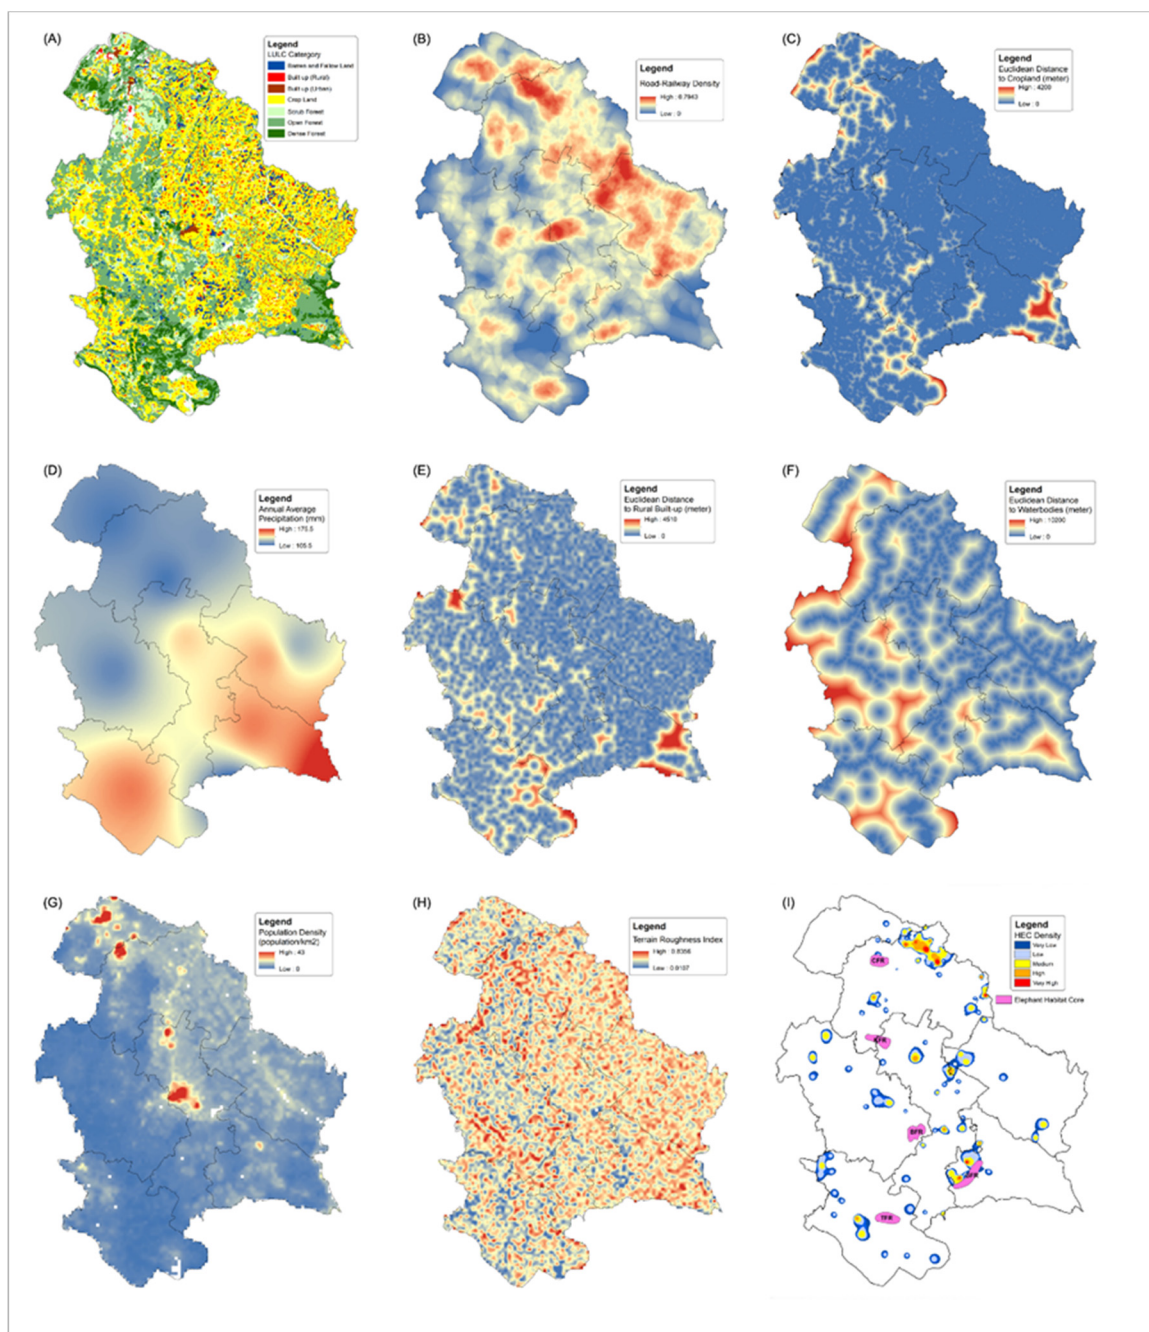

Figure S1. Significant data layers used for elephant occupancy and building resistance surface. (A) LULC (including open/dense forest, scrub land, urban/rural development, croplands and fallow lands), (B) road-railway density, (C) ECD cropland, (D) annual average precipitation, (E) ECD rural development, (F) ECD waterbodies, (G) population density, (H) terrain roughness/slope and (I) HEC

density. The layers (A) to (E) were used for detectability modeling, while LULC, road-railway density, population density, slope, and HEC density layers were used to build a resistance surface by an analysis overlaying weighted layers based on resistance score and weights (Table 2.) [LULC: land use land cover, ECD: Euclidean distance, HEC: Human elephant conflict]

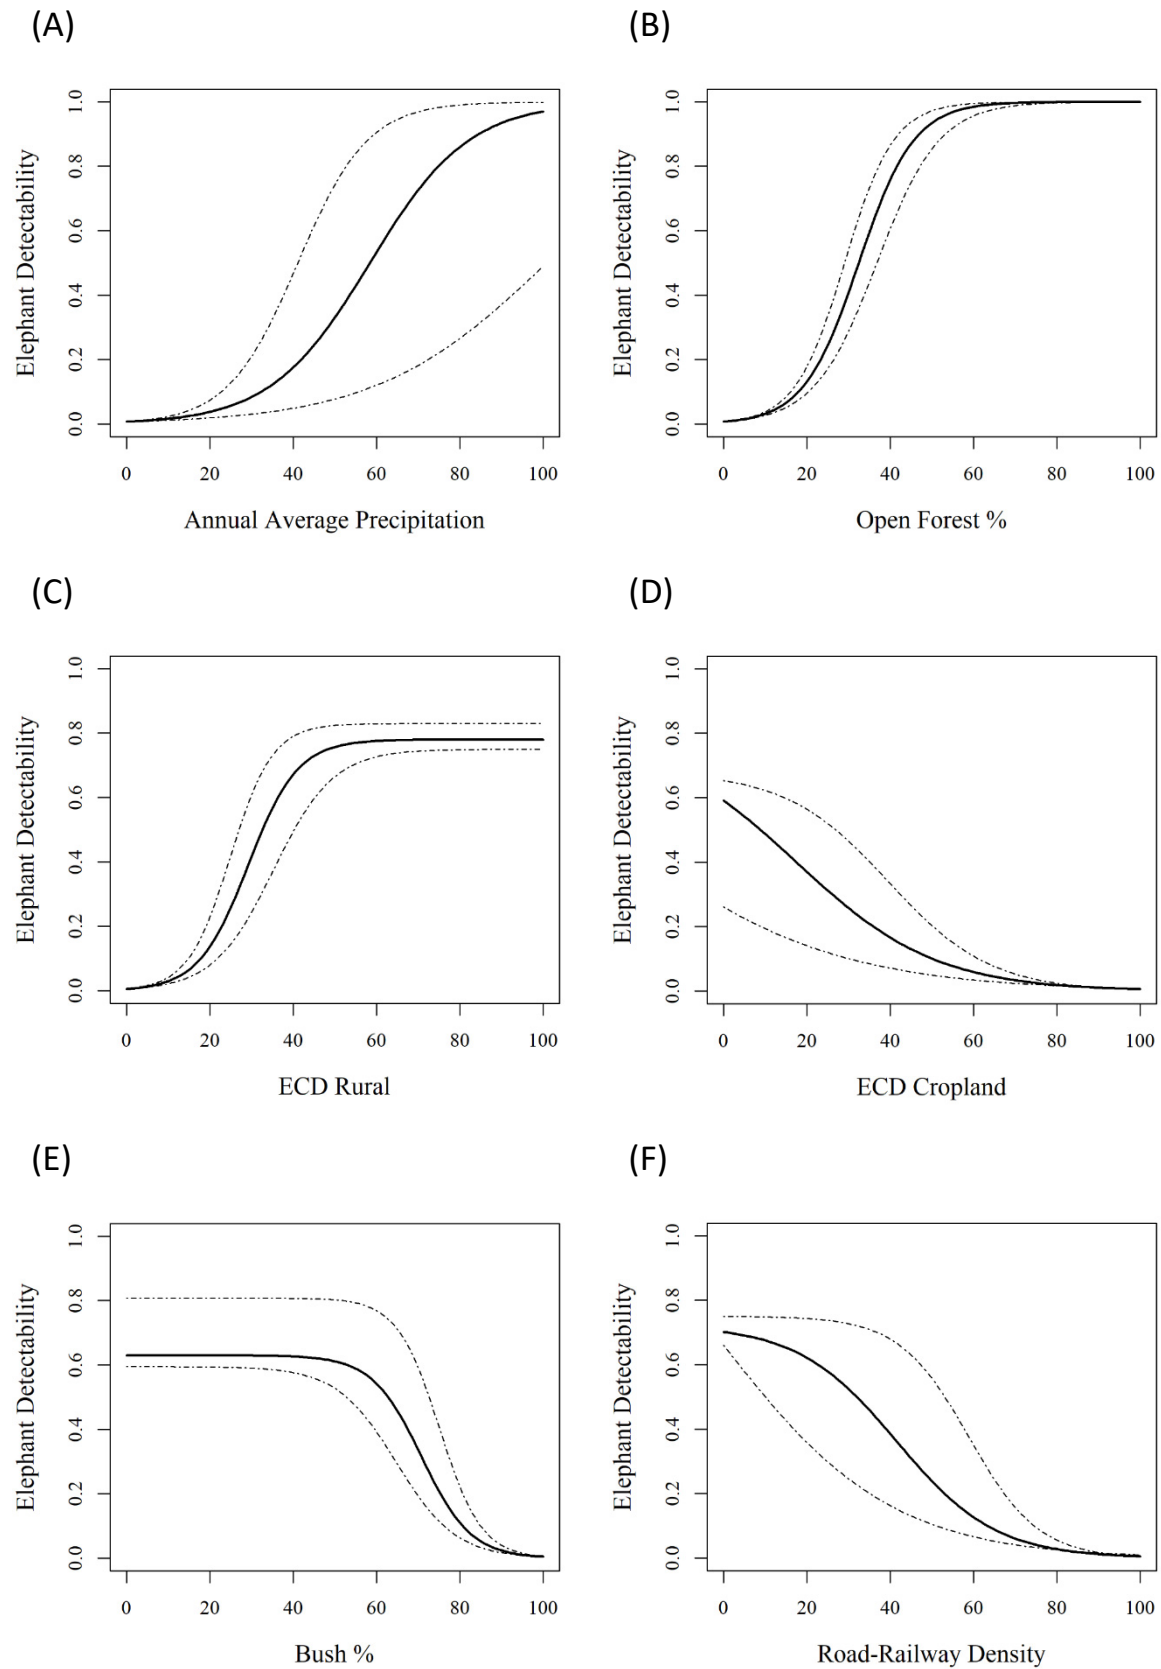

Figure S2. Relationships between the estimated probability for elephant occupancy and the influential covariates. Precipitation (A), open forest% (B) and ECD rural (D) showed a positive relationship, while

ECD cropland(C), Road-Railway density (E) and bush% (F) were negatively related to the probability of elephant occupancy. [ECD: Euclidean distance]

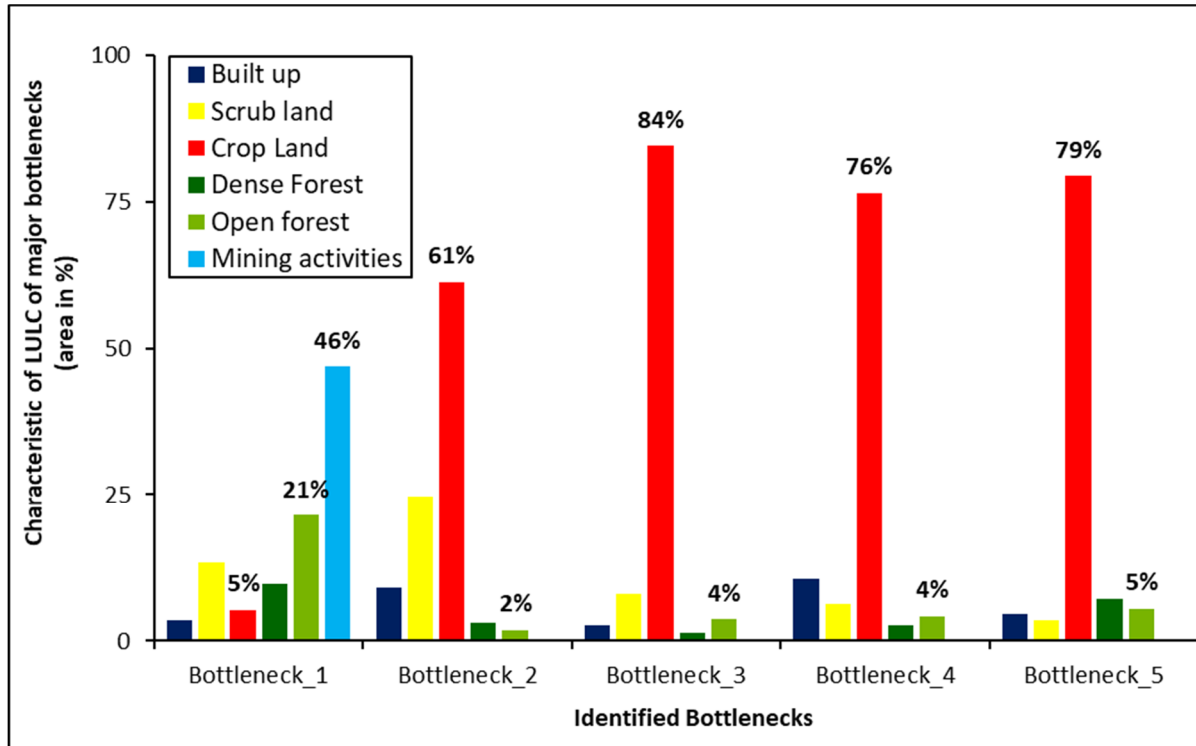

Figure S3. Landscape characteristics of the identified major bottlenecks along with their respective average cumulative movement flow. These bottlenecks were extracted from the polygons containing grid-cells with a cumulative movement flow exceeding 0.4Amp/grid.
